# Supplementary material for: A study of sclerochronology by laser ablation ICP-MS
Source: Royal Society of Chemistry journal article supplement (doi:10.1039/b002014l), 2000-01-01
Supplement: figures.doc [file figures.doc]

# Supplementary data


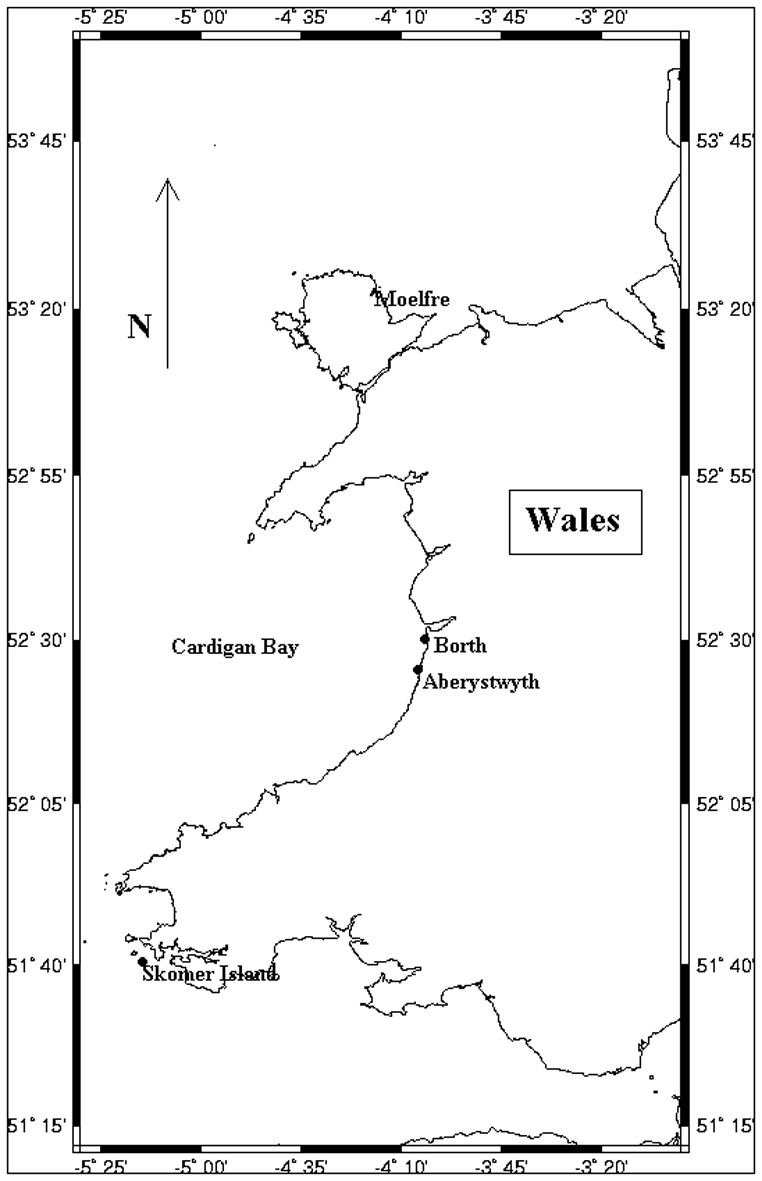


**Map 1** Map of Cardigan Bay showing sample site for *Arctica islandica* (Borth) *and* sample sites for temperature measurement (Skomer in the south and Moelfre in the north).


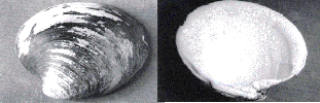


**Fig. 1** View of unarticulated *Arctica* shell. Showing external Periostracum (dark colouring) and internal nacreous layer (light coloured). Shell show is 8cm by 10cm.


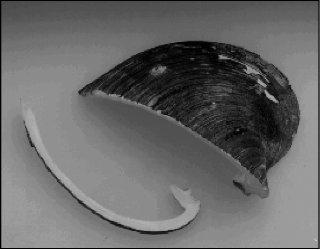


**Fig. 2** Sawn left valve of *Arctica* shell with 10mm thick section for analyses also shown. Section shown is 8cm long.
